# Supplementary material for: Cryo-electron tomography of Birbeck granules reveals the molecular mechanism of langerin lattice formation
Source: PubMed Central journal article supplement (PMC9259017; doi:10.7554/elife.79990), 2022-06-27

Original western blot file: Figure 5B(left) and 5C

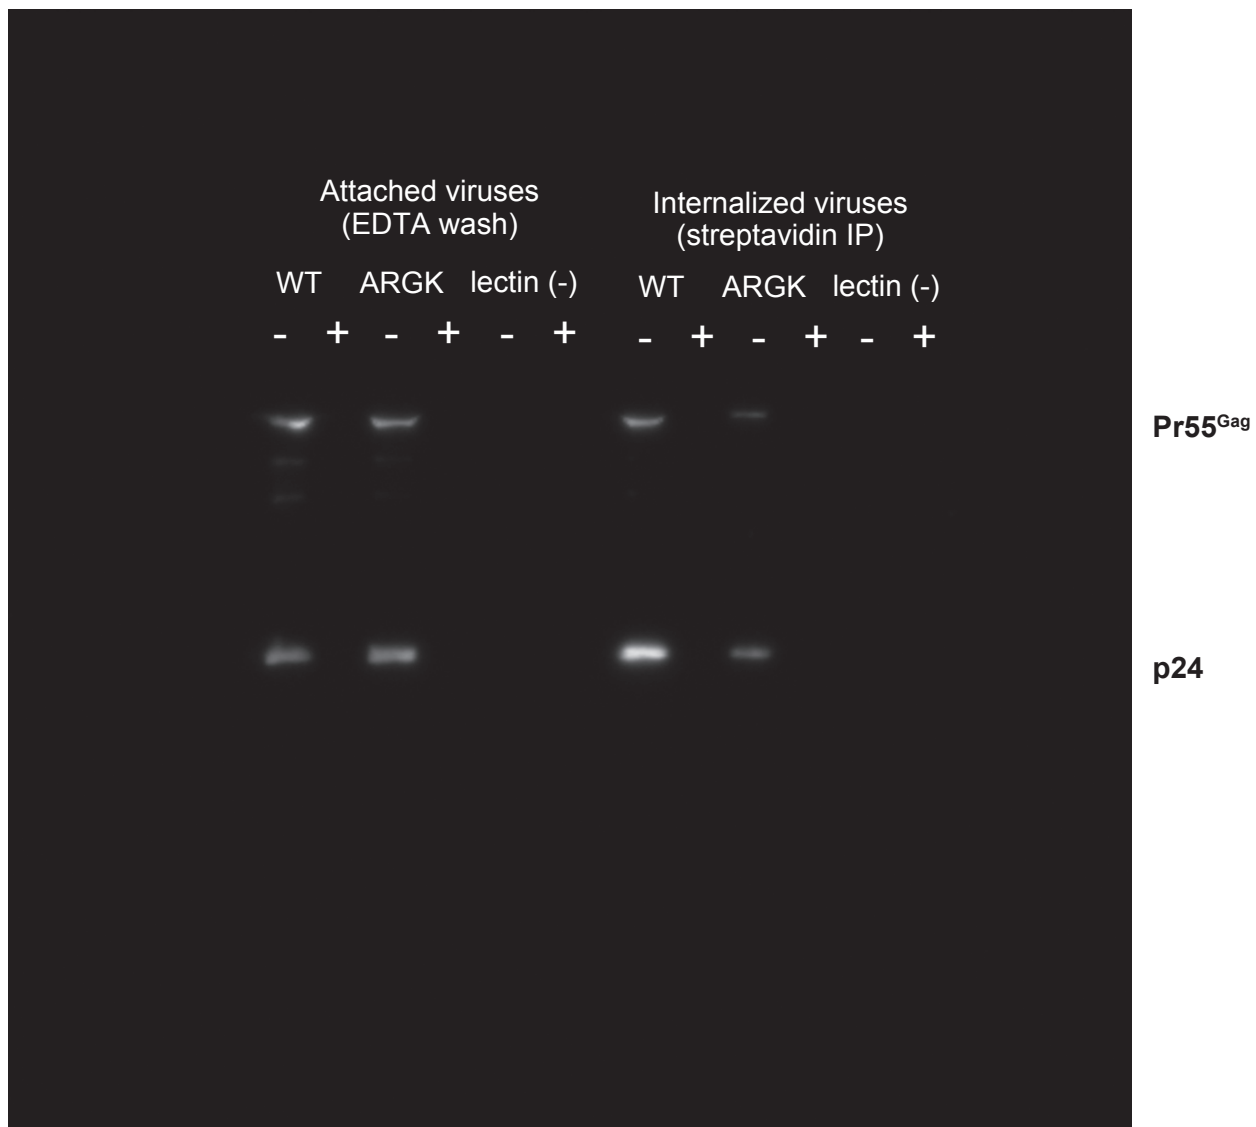

Supplement: elife-79990-fig5-data6.pdf [file elife-79990-fig5-data6.pdf]
