# Supplementary material for: Cryo-electron tomography of Birbeck granules reveals the molecular mechanism of langerin lattice formation
Source: eLife journal article supplement (doi:10.7554/elife.79990), 2022-06-27

Original gel image: Figure 1D

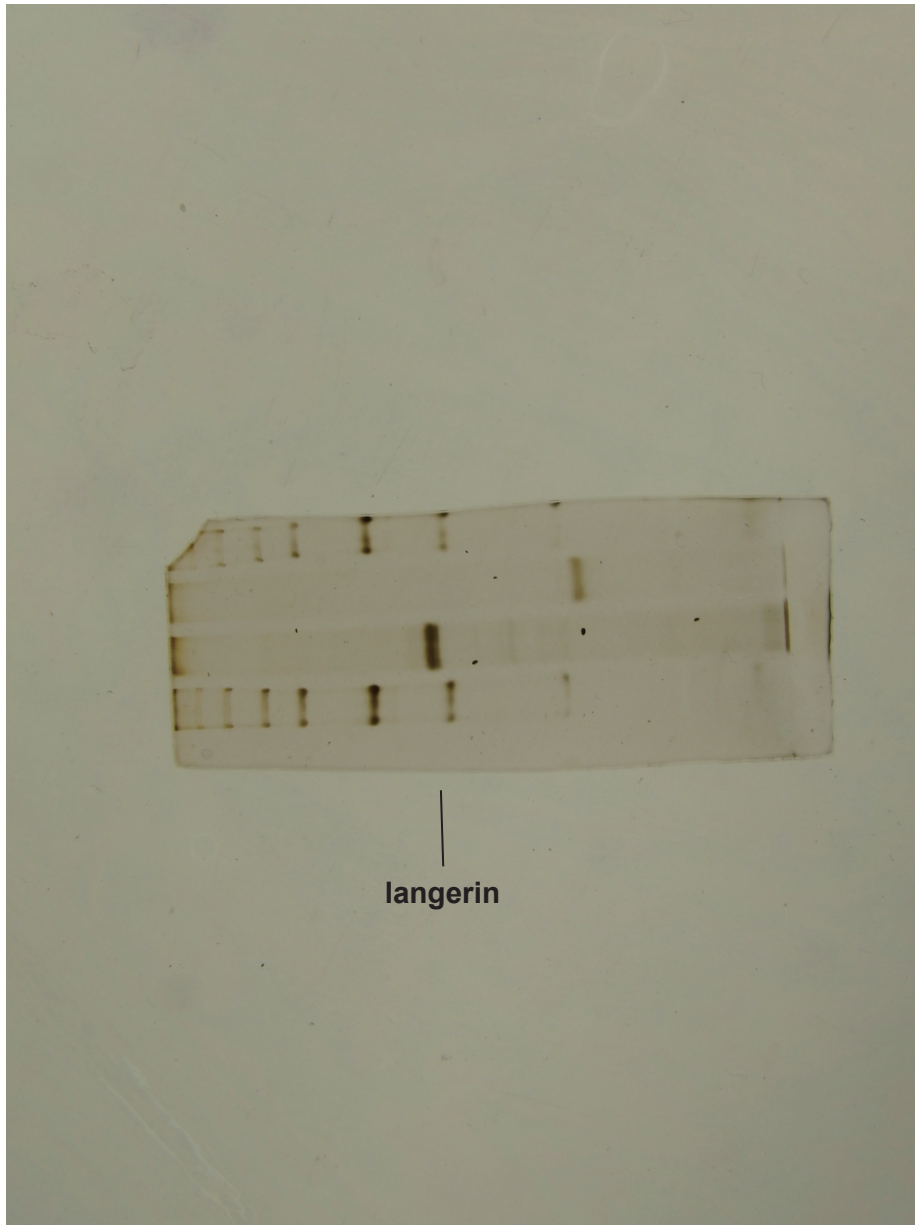

Supplement: fig1-data2 [file elife-79990-fig1-data2-v2.pdf]
