# Supplementary material for: Cryo-electron tomography of Birbeck granules reveals the molecular mechanism of langerin lattice formation
Source: eLife journal article supplement (doi:10.7554/elife.79990), 2022-06-27
Supplement: fig5-data4 [file elife-79990-fig5-data4-v2.pdf]

Original western blot file: Figure 5B

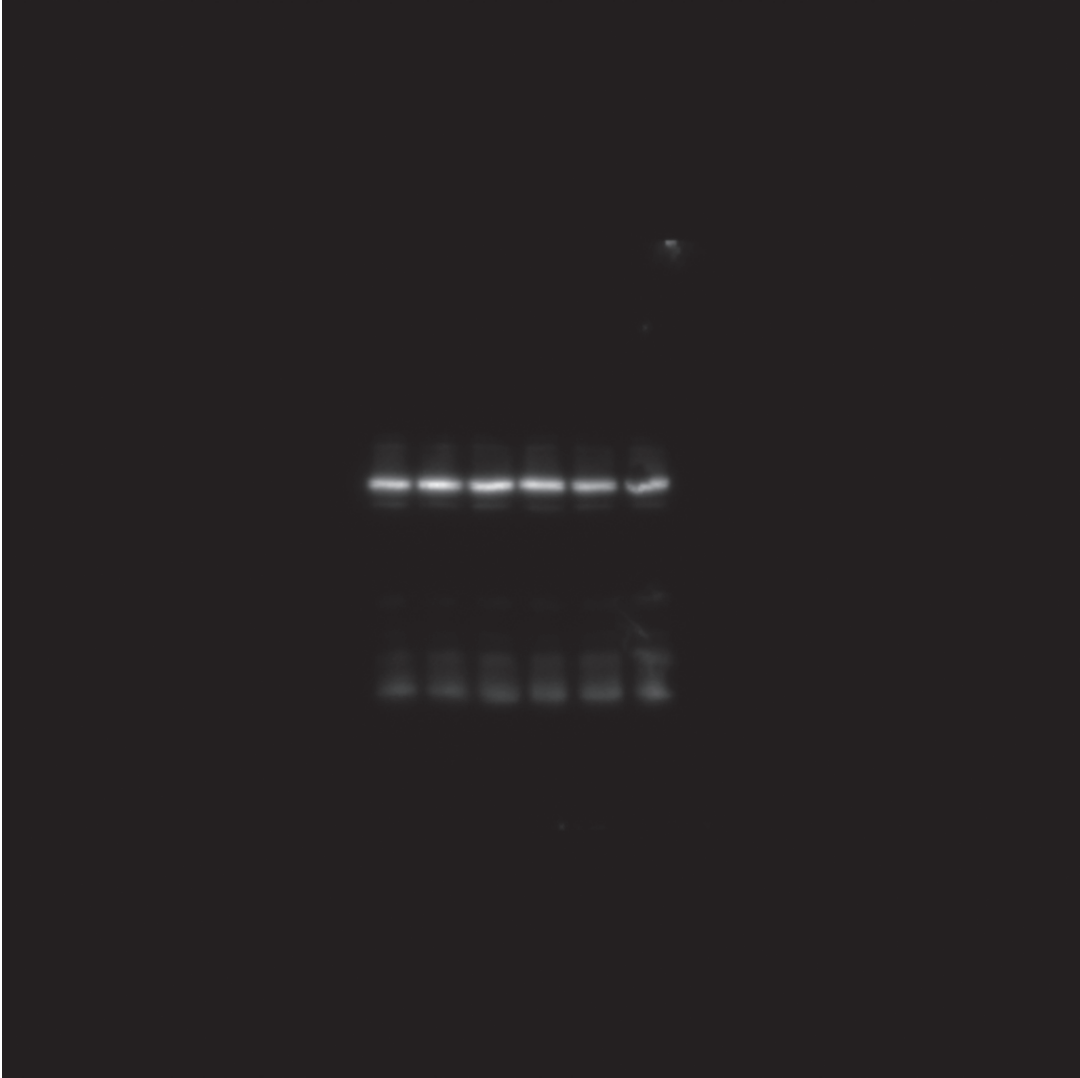

langerin
