# Supplementary figures and images for: Cryo-electron tomography of Birbeck granules reveals the molecular mechanism of langerin lattice formation
Source: eLife journal article supplement (doi:10.7554/elife.79990), 2022-06-27

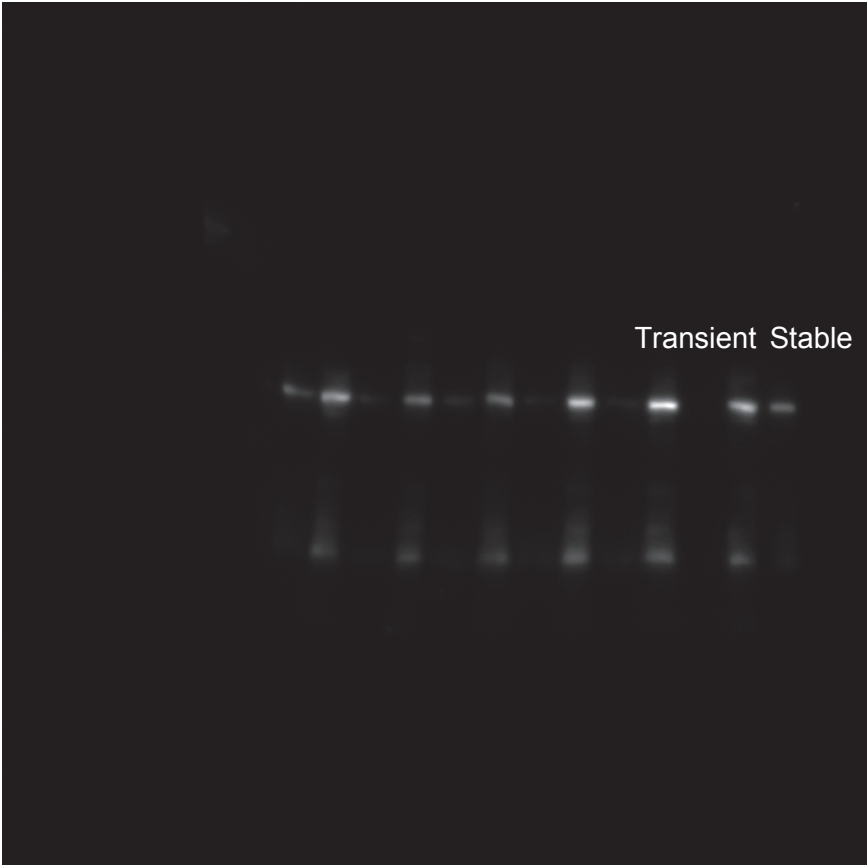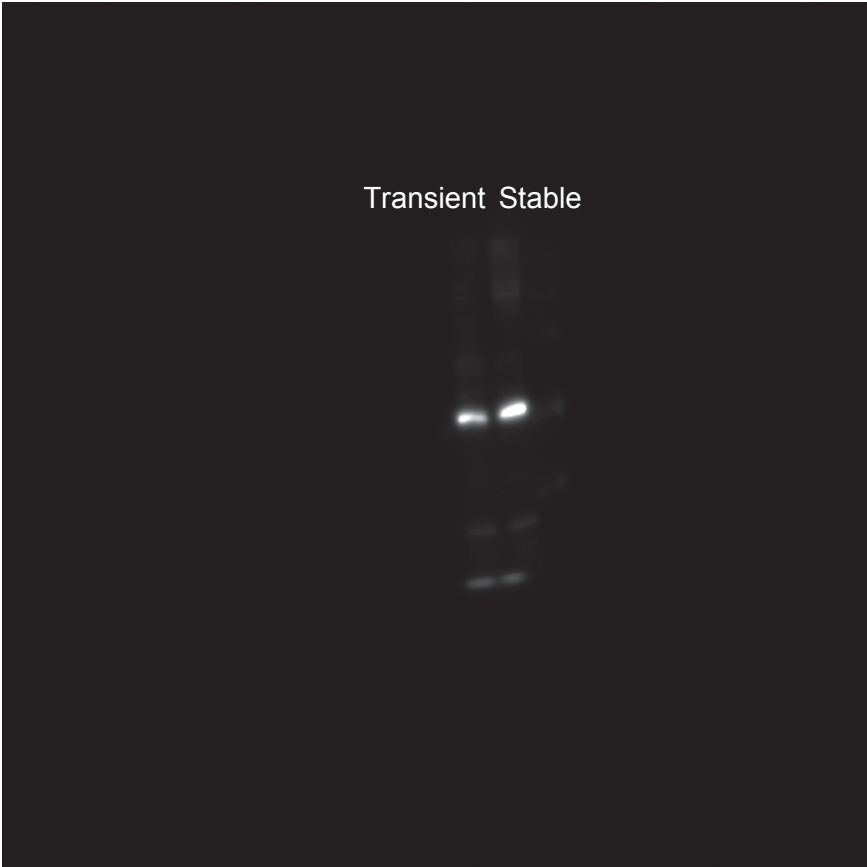

Supplement: fig5-figsupp1-data4 [file elife-79990-fig5-figsupp1-data4-v2.zip]

**A****GFP**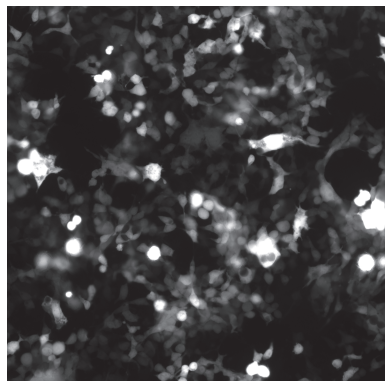**Trans**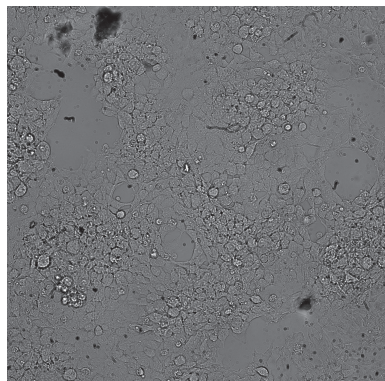**B**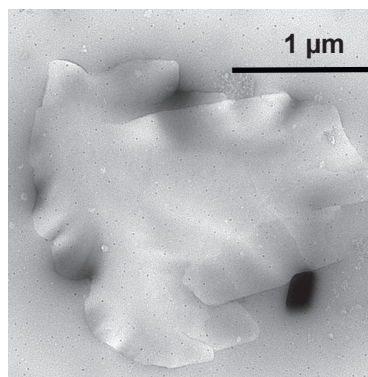**C**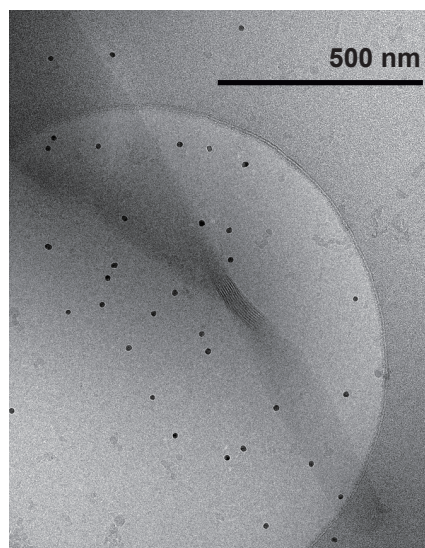**D**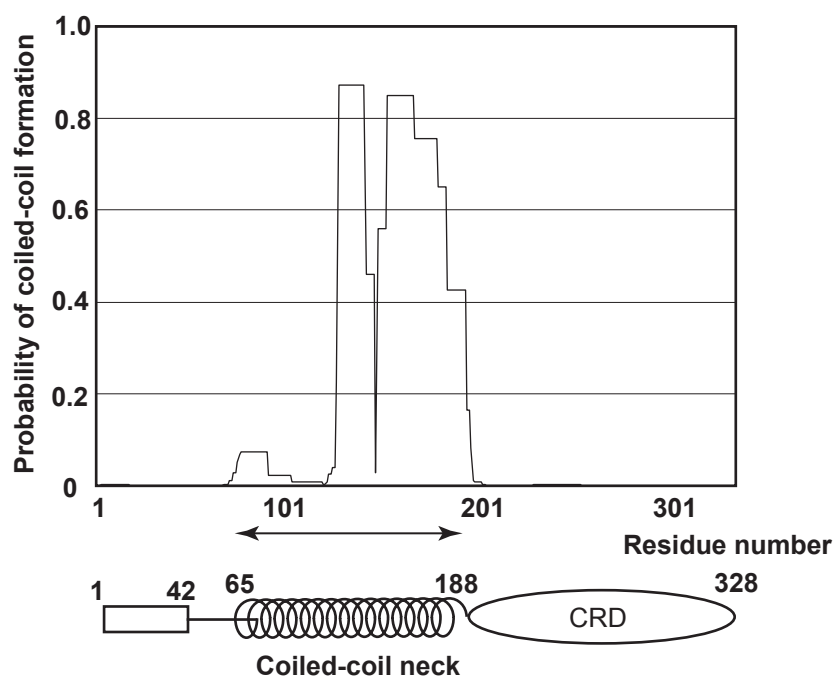

Supplement: supp [file elife_poa_e79990_Figure_1_figure_supplement_1.pdf › elife_poa_e79990_Figure_1_figure_supplement_1.pdf]

**A**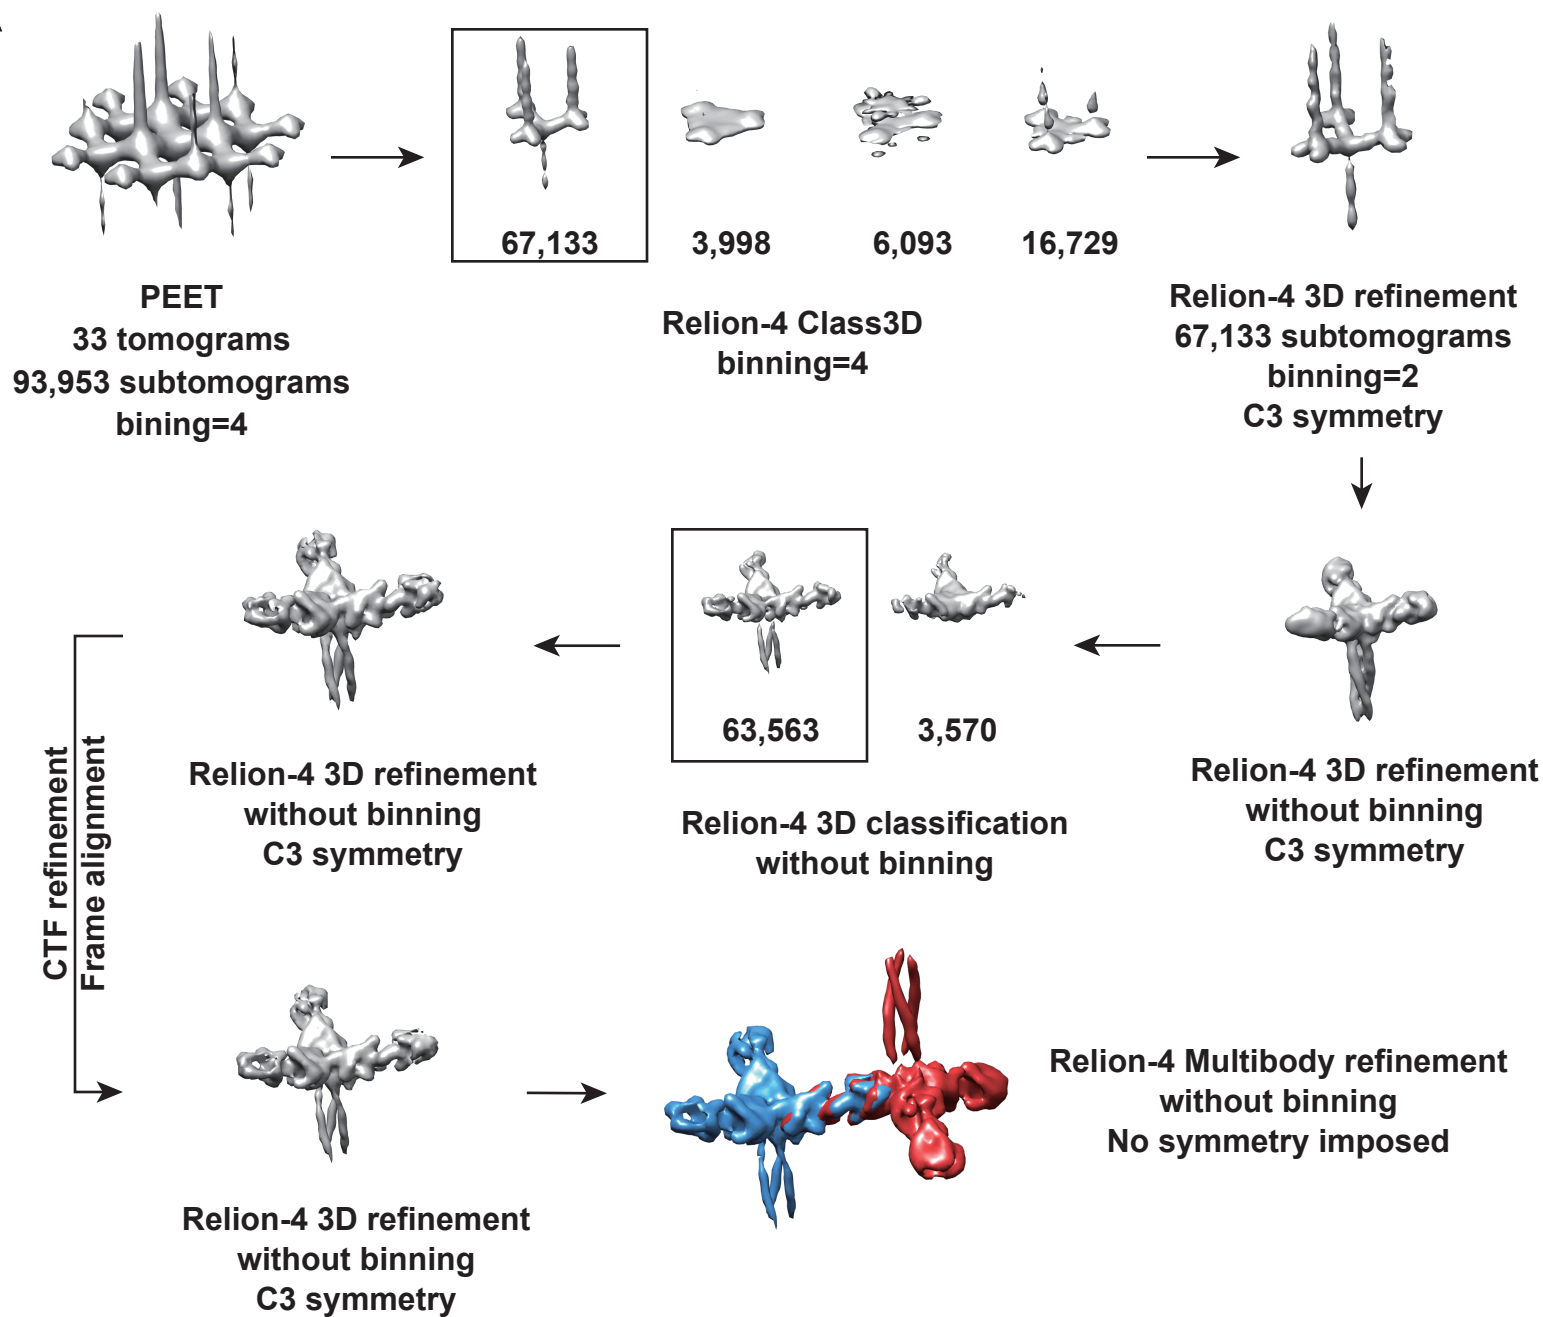**B**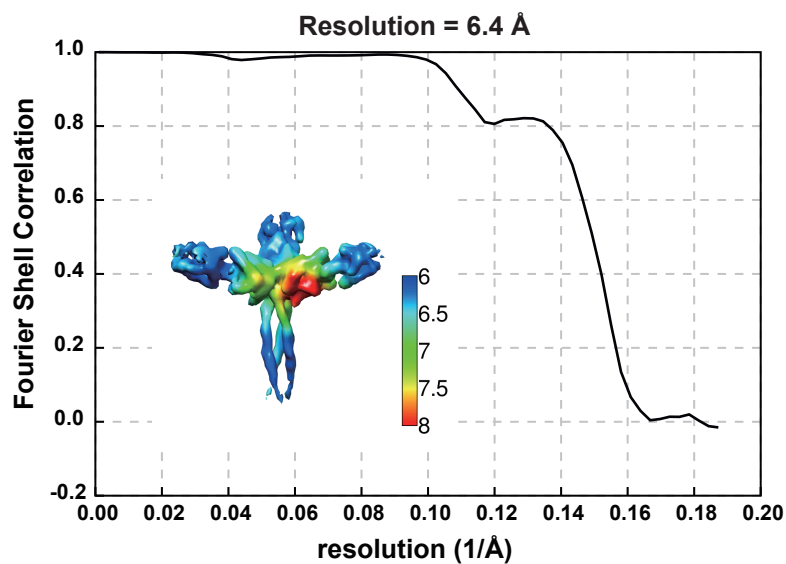**C**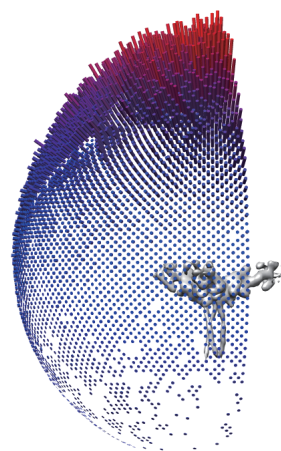

Supplement: supp [file elife_poa_e79990_Figure_2_figure_supplement_1.pdf › elife_poa_e79990_Figure_2_figure_supplement_1.pdf]

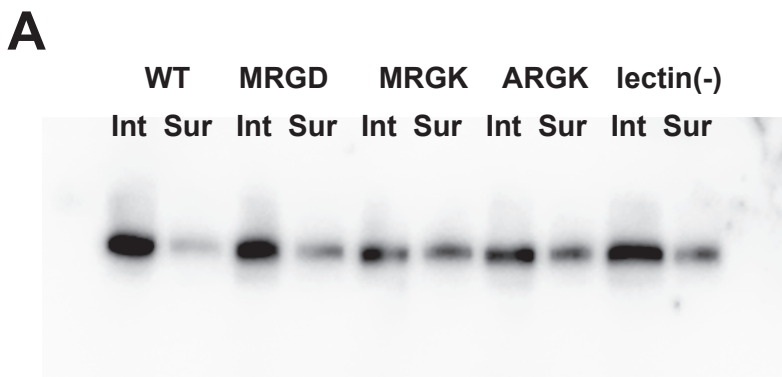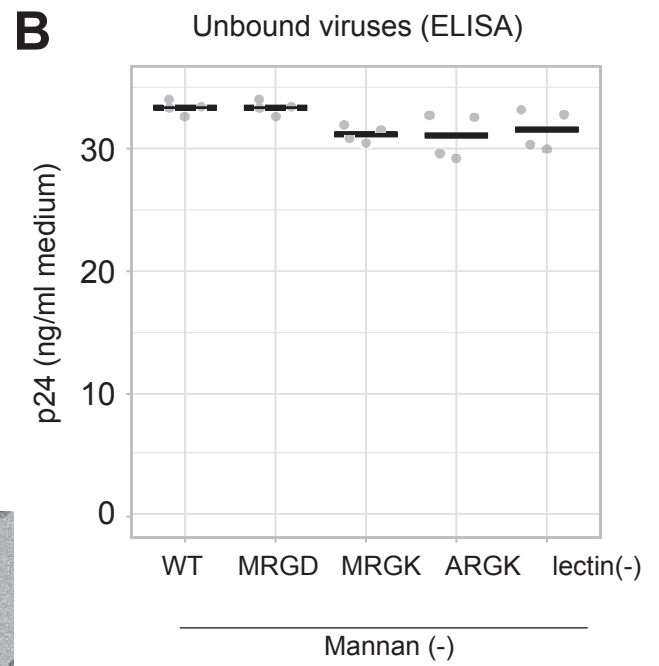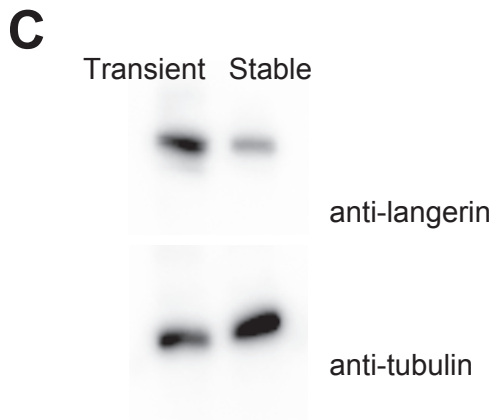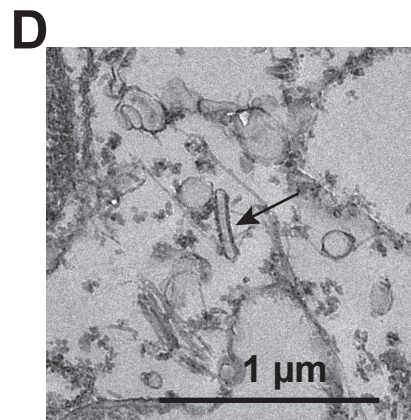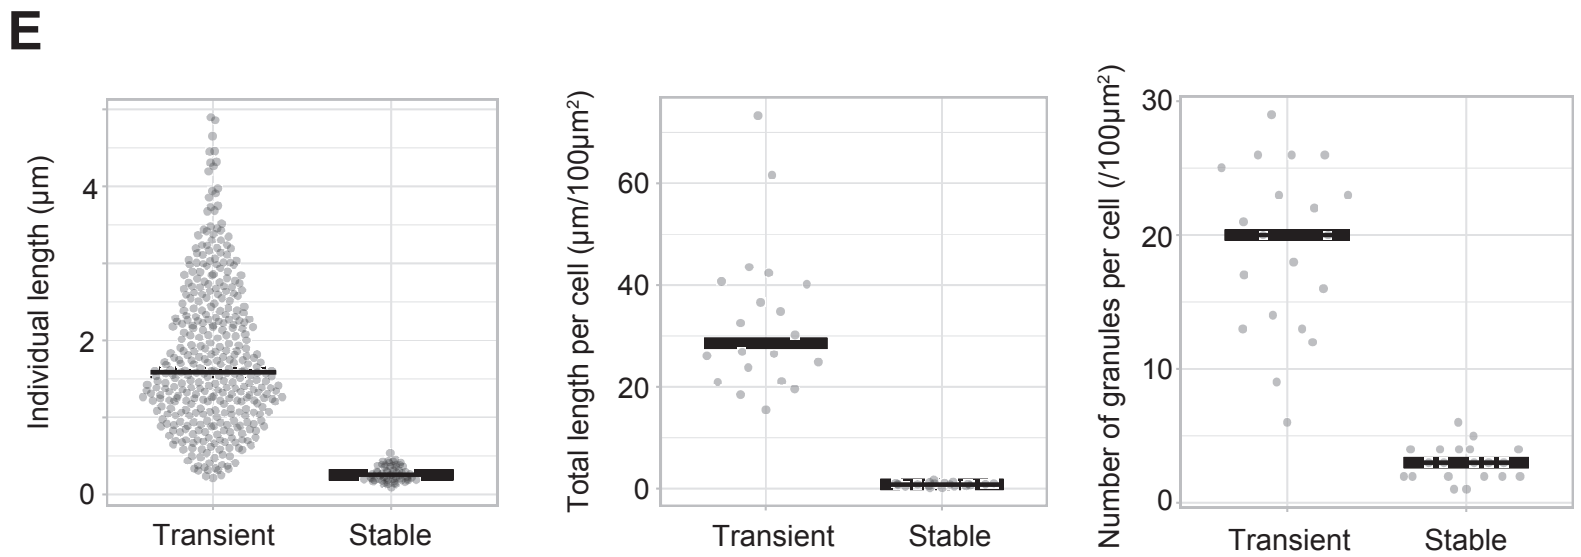

Supplement: supp [file elife_poa_e79990_Figure_5_figure_supplement_1.pdf › elife_poa_e79990_Figure_5_figure_supplement_1.pdf]
